# Supplementary material
Source: publisher figshare collection journal article supplement (https://acs.figshare.com/ndownloader/files/28456351)
Supplement: Supplementary file 1 [file 28456351]

**Supporting Information** for the manuscript entitled “The Effects of Hydrogen Peroxide on Cyanobacterium *Microcystis aeruginosa* in the Presence of Nanoplastics”

*Yawen Guo, Anna M. O’Brien, Tiago F. Lins, René Sahba Shahmohammadloo, Xavier Ortiz  
Almirall, Chelsea M. Rochman, and David Sinton*

## Material and methods: Calculation of Nanoplastic Particle Number Concentration

The concentration levels of nanoplastics tested in present study ranged from 5 mg L<sup>-1</sup> to 100 mg L<sup>-1</sup>. Mass concentration is commonly used due to the sampling and characterization challenges of nanoplastics, so we conform to this norm. To calculate the particle number concentration of polystyrene nanoparticles in the solution,

$$\text{Particle Number Concentration} = \frac{\text{Mass Concentration}}{\text{Mass Per Nanoparticle}} = 3 * \frac{\text{Mass Concentration}}{4\pi \times r^3 \times \rho}$$

where,  $\rho$  = density of polystyrene = 1.04 g cm<sup>-3</sup>,  $r$  = average radius of nanoparticles = 50 nm =  $5 \times 10^{-8}$  cm. Thus, the particle number concentration of polystyrene nanoparticles used in this study were:  $9.18 \times 10^{15}$ ,  $1.84 \times 10^{16}$ ,  $5.51 \times 10^{16}$ ,  $9.18 \times 10^{16}$ ,  $1.84 \times 10^{17}$  particles L<sup>-1</sup>, equivalent to the mass concentration of 5, 10, 30, 50, 100 mg L<sup>-1</sup>, respectively.

## Materials and methods: Calculation of Relative H<sub>2</sub>O<sub>2</sub> Decrements

In addition to the change of H<sub>2</sub>O<sub>2</sub> concentration in 24 h, we also calculated the relative H<sub>2</sub>O<sub>2</sub> decrements value of each treatment. We set the values of the change of H<sub>2</sub>O<sub>2</sub> concentration in 0 mg L<sup>-1</sup> nanoplastics treatment group as the reference group for both initial H<sub>2</sub>O<sub>2</sub> concentration, and compared the values of 5, 10 mg L<sup>-1</sup> nanoplastics treatment groups to the reference groups at their corresponding initial H<sub>2</sub>O<sub>2</sub> concentration. As Figure illustrated in S9, the relative H<sub>2</sub>O<sub>2</sub> decrement of 5 and 10 mg L<sup>-1</sup> nanoplastics groups were all smaller than 1 at both initial H<sub>2</sub>O<sub>2</sub> concentration, implying that the change of H<sub>2</sub>O<sub>2</sub> concentration was less than compared with nanoplastic-free groups, in other words, nanoplastics inhibit the decomposition of H<sub>2</sub>O<sub>2</sub> in BG-11 media.

### **Discussion: Calculation of Relative Irradiance Loss**

We measured the optical density (absorbance) at 680 nm of solutions with different nanoplastics concentrations, calculated the relative irradiance light loss, and interpolated a curve between nanoplastics concentration and relative irradiance loss.

Optical density is defined as:

$$\text{Optical Density} = \log_{10}\left(\frac{I_0}{I_1}\right)$$

where  $I_0$  is the intensity of visible light incident upon a small area of the film, and  $I_1$  is the intensity of light transmitted by that region of the film. We can calculate  $\frac{I_1}{I_0}$ , which is the transmittance of solutions with different nanoplastics concentrations based on their corresponding optical density value. Then, the irradiance loss, which is defined as  $1 - \frac{I_1}{I_0}$ , can be determined. Lastly, we subtracted the irradiance loss of solutions with nanoplastics added with that of solutions without nanoplastics added, and name this value the “Relative Irradiance Loss”.

### **Discussion: Testing Effect of Irradiance Loss Induced by Nanoplastics on Cell Abundance**

We tested how well the effects of light transmitted calculated based on the relative light loss explain the effects of nanoplastics on cell abundance, and found the AICc values of the new model, which replaced light transmitted with the nanoplastics and light intensity terms in the original model, was much more positive (18112) compared with the original model 1 (14158.9), implying that the effects of nanoplastics on *M. aeruginosa* abundance can only be partially described by their ability to affect transmitted light.

**Table S1.** Summary statistics for the linear regression model of the full-factorial experiment for the effects of four factors (H<sub>2</sub>O<sub>2</sub>, Nanoplastics, Light, and Temperature), and their full-factorial interactions on *M. aeruginosa* abundance. Exclude treatments with the highest nanoplastics (100 mg L<sup>-1</sup>) and H<sub>2</sub>O<sub>2</sub> (20 mg L<sup>-1</sup>) level.

| Term                                                               | Estimated Coefficient | F ratio | Prob > F |
|--------------------------------------------------------------------|-----------------------|---------|----------|
| H <sub>2</sub> O <sub>2</sub>                                      | -2.254                | 380.32  | < .0001  |
| Nanoplastics                                                       | -1.2000               | 82.00   | < .0001  |
| Temperature                                                        | -0.298                | 6.45    | 0.0111   |
| Light                                                              | -0.049                | 0.14    | 0.7045   |
| Temperature × H <sub>2</sub> O <sub>2</sub>                        | -0.881                | 38.71   | < .0001  |
| H <sub>2</sub> O <sub>2</sub> × Nanoplastics                       | 0.975                 | 37.14   | < .0001  |
| Temperature × Nanoplastics                                         | -0.717                | 19.47   | < .0001  |
| H <sub>2</sub> O <sub>2</sub> × Light                              | -0.125                | 0.64    | 0.4233   |
| Nanoplastics × Light                                               | 0.067                 | 0.14    | 0.7092   |
| Temperature × Light                                                | 0.027                 | 0.03    | 0.8659   |
| Temperature × H <sub>2</sub> O <sub>2</sub> × Nanoplastics         | -0.647                | 10.91   | 0.0010   |
| Temperature × Nanoplastics × Light                                 | -0.376                | 2.96    | 0.0853   |
| H <sub>2</sub> O <sub>2</sub> × Nanoplastics × Light               | 0.272                 | 1.60    | 0.2064   |
| Temperature × H <sub>2</sub> O <sub>2</sub> × Light                | -0.235                | 1.52    | 0.2174   |
| Temperature × H <sub>2</sub> O <sub>2</sub> × Nanoplastics × Light | -0.420                | 2.54    | 0.1114   |

**Table S2.** Summary statistics for the linear regression model of the full-factorial experiment for the effects of four factors (H<sub>2</sub>O<sub>2</sub>, Nanoplastics, Light, and Temperature), and their full-factorial interactions on total MC-LR and MC-dmLR production

| Term                                         | Estimated Coefficient | F ratio | prob > F |
|----------------------------------------------|-----------------------|---------|----------|
| H <sub>2</sub> O <sub>2</sub>                | -22.592               | 70.04   | <.0001   |
| Nanoplastics                                 | -17.198               | 40.58   | <.0001   |
| Temperature                                  | 3.742                 | 1.92    | 0.1759   |
| Light                                        | -2.839                | 1.11    | 0.3013   |
| H <sub>2</sub> O <sub>2</sub> × Nanoplastics | 16.720                | 38.36   | <.0001   |

|                                                                                         |        |      |        |
|-----------------------------------------------------------------------------------------|--------|------|--------|
| Temperature $\times$ Nanoplastics                                                       | -4.199 | 2.42 | 0.1303 |
| Temperature $\times$ Light                                                              | -2.273 | 0.71 | 0.4065 |
| Temperature $\times$ H <sub>2</sub> O <sub>2</sub>                                      | -1.699 | 0.40 | 0.5338 |
| Nanoplastics $\times$ Light                                                             | -0.603 | 0.05 | 0.8249 |
| H <sub>2</sub> O <sub>2</sub> $\times$ Light                                            | -0.293 | 0.01 | 0.9144 |
| Temperature $\times$ H <sub>2</sub> O <sub>2</sub> $\times$ Nanoplastics                | 4.255  | 2.48 | 0.1255 |
| H <sub>2</sub> O <sub>2</sub> $\times$ Nanoplastics $\times$ Light                      | 1.619  | 0.36 | 0.5533 |
| Temperature $\times$ Nanoplastics $\times$ Light                                        | 1.470  | 0.30 | 0.5901 |
| Temperature $\times$ H <sub>2</sub> O <sub>2</sub> $\times$ Light                       | 1.218  | 0.20 | 0.6551 |
| Temperature $\times$ H <sub>2</sub> O <sub>2</sub> $\times$ Nanoplastics $\times$ Light | -0.407 | 0.02 | 0.8812 |

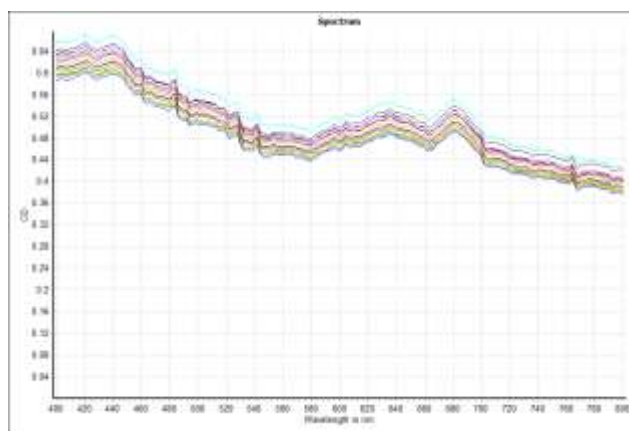

**Figure S1.** Absorbance spectra of *Microcystis aeruginosa*

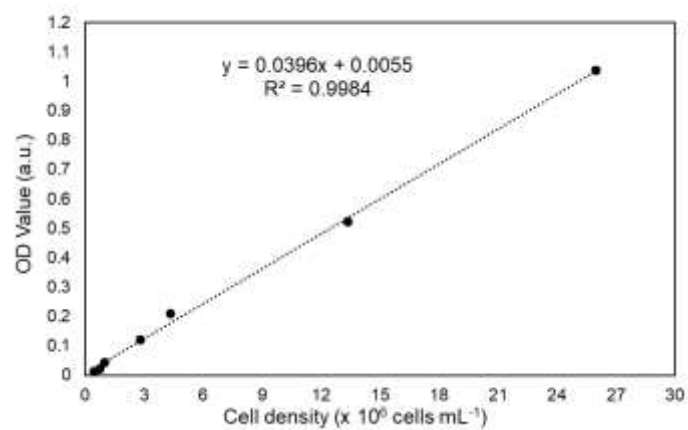

**Figure S2.** Linearly proportional correlation between *Microcystis aeruginosa* suspension of various cell densities and OD value at 680 nm. Data are presented as means ( $n = 4$ )  $\pm$  SE

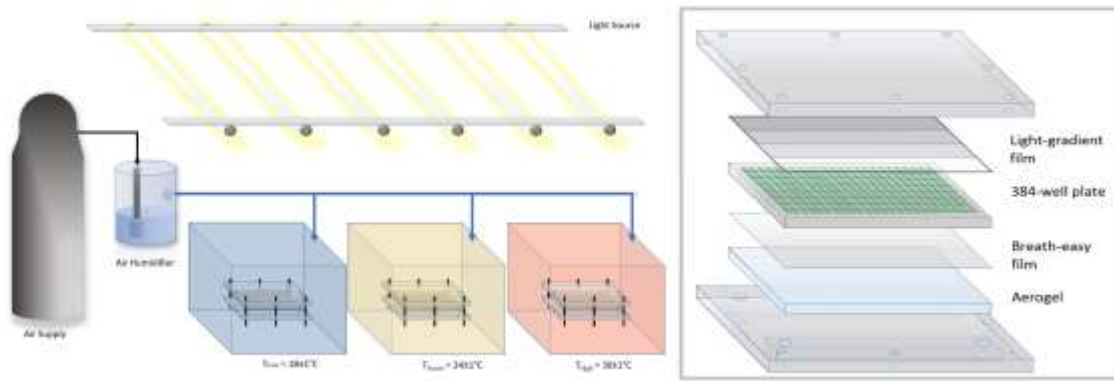

**Figure S3.** Systematic illustration of platform setup consisting of variables control and full-factorial screening devices. Inset: expanded schematic of the main components of one individual device.

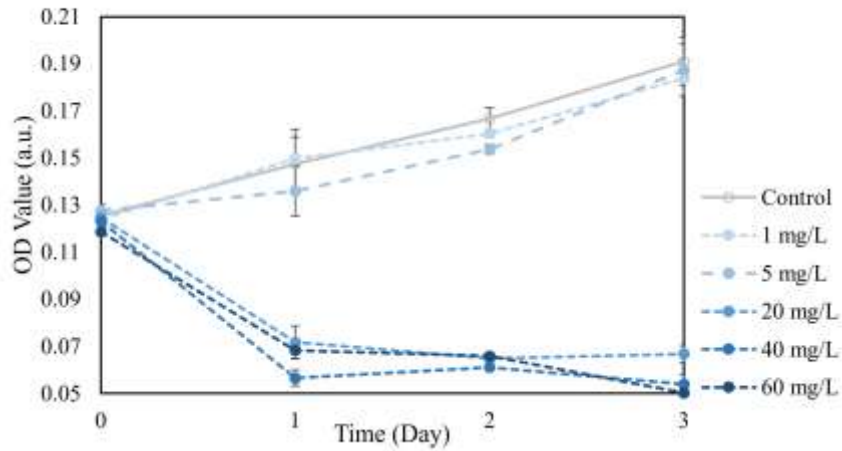

**Figure S4.** Reduction of *M. aeruginosa* abundance under different  $\text{H}_2\text{O}_2$  concentrations (0, 1, 5, 20, 40, 60  $\text{mg L}^{-1}$ ). Cell density is expressed as the optical density value. Data are presented as means ( $n = 16$ )  $\pm$  SE

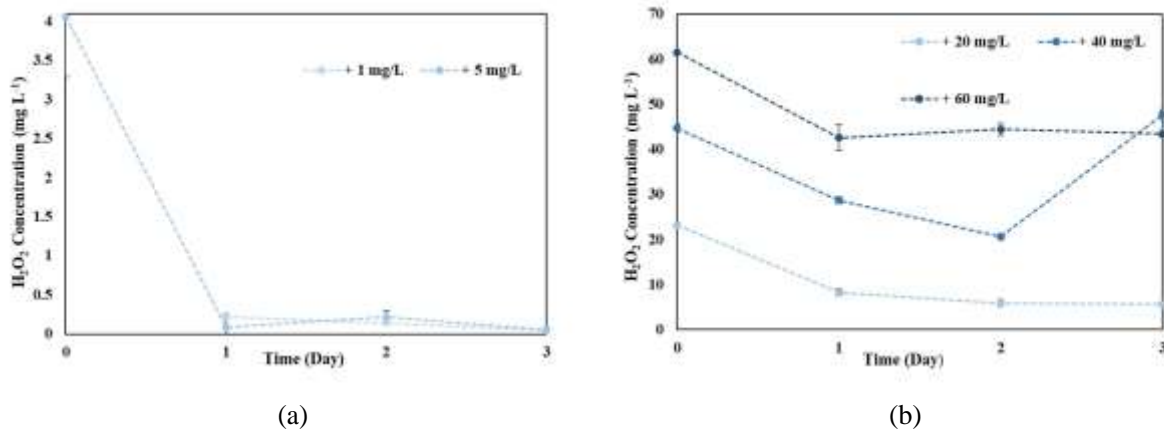

**Figure S5.** The remaining  $\text{H}_2\text{O}_2$  concentration in *M. aeruginosa* cultures with an initial  $\text{H}_2\text{O}_2$  dosage of (a) 1 and 5, (b) 20, 40 and 60  $\text{mg L}^{-1}$  after 24, 48 and 72 h exposure. Data are presented as means ( $n = 2$ )  $\pm$  SE

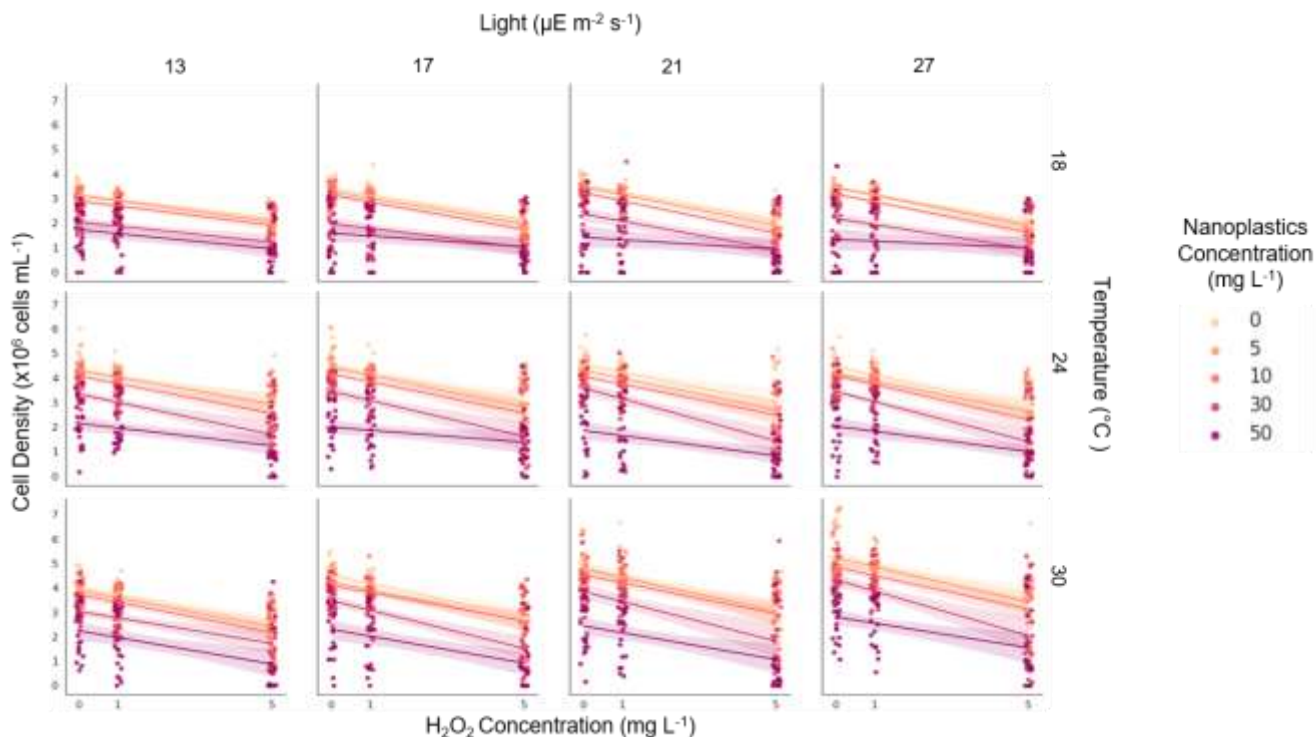

**Figure S6.** Cell density of *Microcystis aeruginosa* after 72 h exposure showing the interactive effects of  $\text{H}_2\text{O}_2$  (0, 1 and 5  $\text{mg L}^{-1}$ , x-axis), light (13, 17, 21, and 27  $\mu\text{mol m}^{-2}\text{s}^{-1}$ , across columns), temperature (18, 24, and 30  $^{\circ}\text{C}$ , across rows), and nanoplastics (0-yellow, 5, 10, 30, 50- red  $\text{mg L}^{-1}$ ; intermediate levels in intermediate colors), with the highest exposure level omitted for NPs and  $\text{H}_2\text{O}_2$ . Fitted model expectations for cell density are shown for each nanoplastic level with lines (mean) and shaded areas (95% CI).

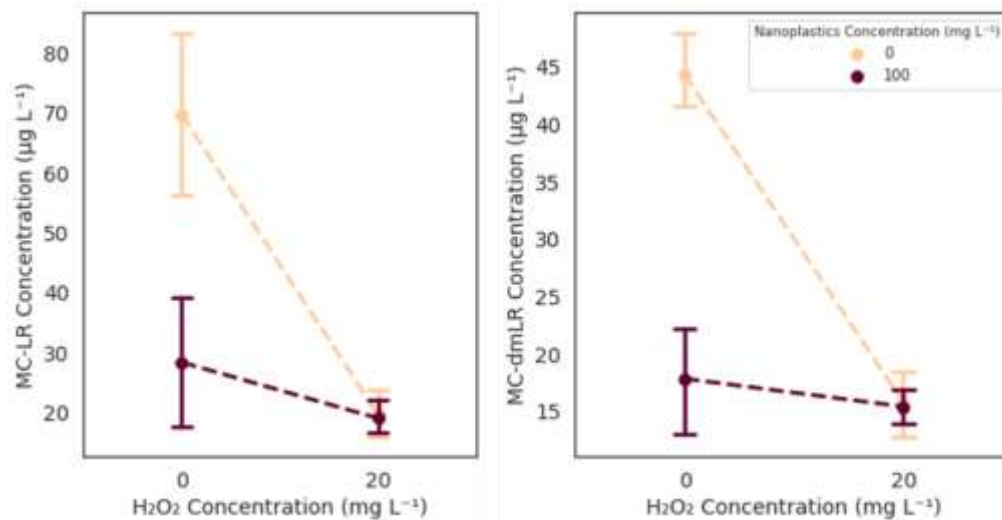

**Figure S7.** MC-LR and MC-dmLR concentration of *M. aeruginosa* after 72 h exposure showing the combined effects of nanoplastics (0, 100 mg L<sup>-1</sup>) and H<sub>2</sub>O<sub>2</sub> (0, 20 mg L<sup>-1</sup>), across all light (13, 27 µmol m<sup>-2</sup>s<sup>-1</sup>), and temperature (18, 30 °C) conditions. a: MC-LR result; b: MC-dmLR result. Bars represent 95% CI.

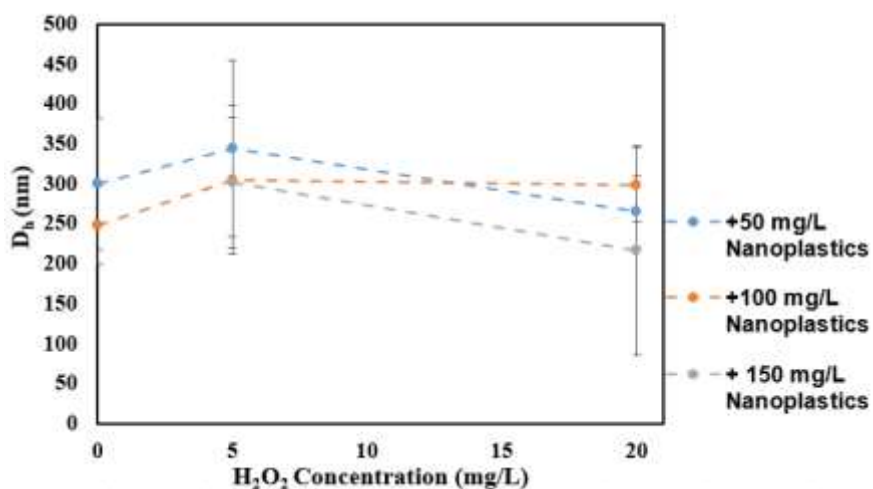

**Figure S8.** D<sub>h</sub> of PS-NH<sub>2</sub> at 50, 100, 150 mg L<sup>-1</sup> in the presence of different H<sub>2</sub>O<sub>2</sub> concentration (0, 5, 20 mg L<sup>-1</sup>) in BG-11 medium, as means ± SE.

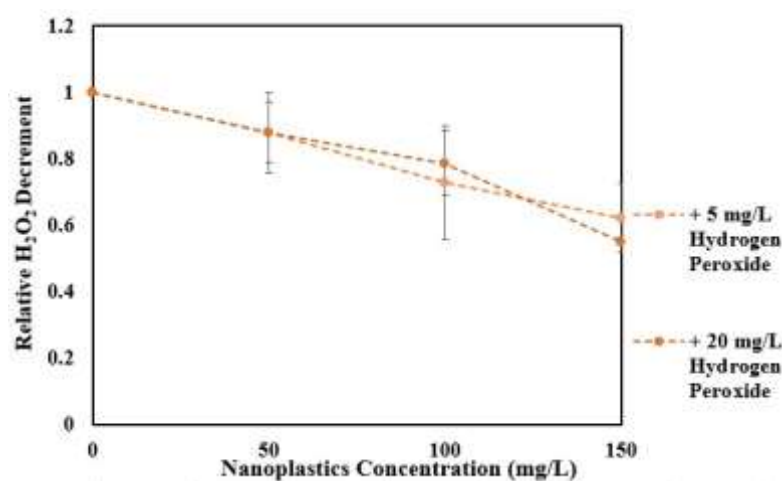

**Figure S9.** Relative H<sub>2</sub>O<sub>2</sub> decrements in 24 h under different nanoplastics (0, 50, 100 and 150 mg L<sup>-1</sup>) and initial H<sub>2</sub>O<sub>2</sub> (5 and 20 mg L<sup>-1</sup>) levels. Each response was the change of H<sub>2</sub>O<sub>2</sub> concentration relative to that at zero nanoplastics conditions (for both initial H<sub>2</sub>O<sub>2</sub> concentrations). Data are presented as means (n = 5) ± SE

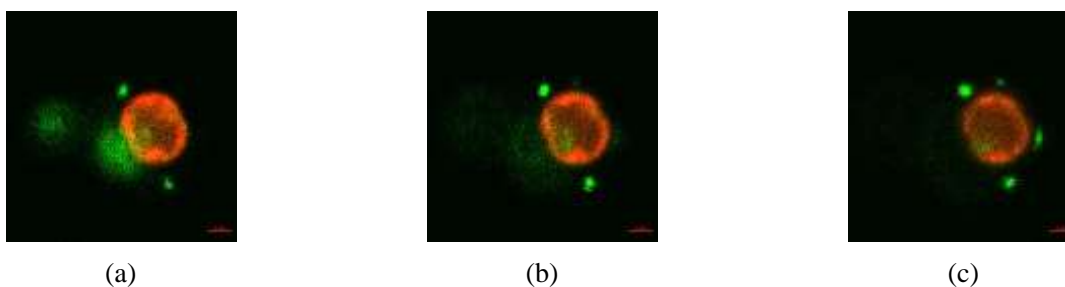

**Figure S10.** Additional Z slices of *M. aeruginosa* cells from confocal microscopy showing the uptake of PS-NH<sub>2</sub> after 72 h of incubation at 10 mg L<sup>-1</sup>. Uptake is indicated by stronger fluorescence in the slice from mid-cell (b), as opposed to slices from either side (a and c). Green fluorescence corresponds to PS-NH<sub>2</sub> beads, red to auto-fluorescent *M. aeruginosa*

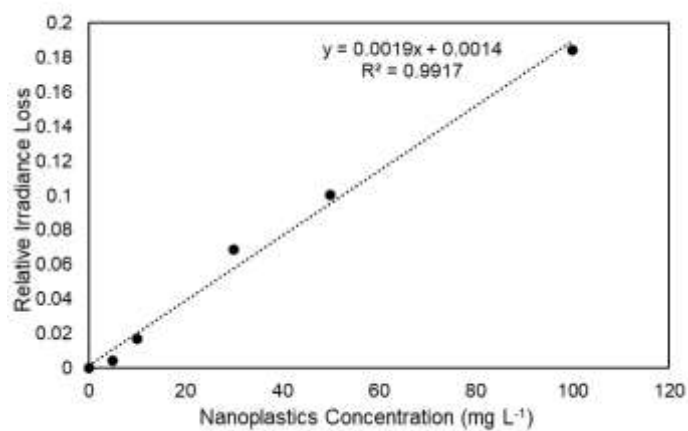

**Figure S11.** Linearly proportional correlation between nanoplastics concentration and relative irradiance loss.
